# Supplementary material
Source: publisher site journal article supplement (http://www.degruyter.com/publication/journal_key/EPOLY/downloadAsset/EPOLY_Voucher%20System%20for%20Reviewers.pdf)
Supplement: Supplementary file 1 [file EPOLY_Voucher%20System%20for%20Reviewers.pdf]

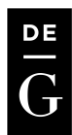

## VOUCHER SYSTEM FOR REVIEWERS

Since June 2020, the Voucher System for Reviewers is available in *e-Polymers*. Each completed peer-review will be rewarded with a voucher containing an amount of money. This amount can be used to decrease the processing fee of next submission in *e-Polymers*.

### VOUCHER POLICY

- 1) Each voucher is valid for 1 year from the day of receiving a voucher confirmation email.
- 2) You can combine vouchers, even up to the full amount of processing fee (you can get a free publication in *e-Polymers*).
- 3) You do not have to use the entire voucher money for one submission - you can split the amount for different submissions or you can save some voucher money for later.
- 4) You can share the voucher with your colleagues.
- 5) Your voucher will be decreased by the indicated amount only if the manuscript is accepted for publication.
- 6) The Editorial Office of *e-Polymers* reserves the right not to provide a voucher, if a peer-review does not meet the standard required for the reviewing process (Reviewer will be informed about this decision).

### HOW TO USE THE VOUCHER

- 1) Log in to the ScholarOne submission system of *e-Polymers*: [click here](#).
- 2) Start the manuscript submission process (in Tab: "Author").
- 3) In Step 6 of submission process, you will find a question: "Do you have a discount?". Please answer: "Yes - Voucher".
- 4) Provide three necessary details:
  - a) First and last name of person who received the voucher,
  - b) Email address of person who received the voucher,
  - c) Voucher amount in EUR to be used for this submission.
- 5) Complete the rest of submission and... it is done! Your processing fee will be decreased by the indicated amount of money.
- 6) Voucher will be valid if registered for a new submission (i.e. it will not be valid if registered only during a submission of revised manuscript).

### HOW TO GET NEW VOUCHERS

- 1) If you would like to be a reviewer in *e-Polymers*, please let us know about it by email.
- 2) Each of your completed reviews will be taken into account (it means that each review of both original and revised manuscripts will be rewarded).
- 3) You will receive a collective voucher for all reviews once the Handling Editor commits the final decision regarding a reviewed manuscript (please note that it might take up to several weeks before you get the voucher).
- 4) This email will contain a new voucher, its expiry date, and information about your other valid vouchers.

### EDITORIAL OFFICE

Managing Editor  
Krzysztof Dębniak, Ph.D.  
De Gruyter Poland Ltd.  
Bogumiła Zuga 32A  
01-811 Warsaw / Poland Tel: +48 22 701 50 15  
email: [epolymers.editorial@degruyter.com](mailto:epolymers.editorial@degruyter.com)  
*e-Polymers*: [www.degruyter.com/view/j/epoly](http://www.degruyter.com/view/j/epoly)
